# Supplementary material for: Activating the high-potential V4+/V5+ redox couple for an advanced NASICON sodium-ion cathode
Source: Royal Society of Chemistry journal article supplement (doi:10.1039/d5cc00157a), 2025-01-01
Supplement: d5cc00157a1.pdf [file d5cc00157a1.pdf]

## Supporting Information

### **Activating the high-potential $V^{4+}/V^{5+}$ redox couple for an advanced NASICON sodium-ion cathode**

Miaomiao Wang,<sup>a</sup> Lin Zhu,<sup>a</sup> Shuang Xiang,<sup>a</sup> Xiaobing Huang,<sup>b</sup> Huanhuan Li,<sup>c</sup> Haiyan Wang,<sup>a</sup> Yougen Tang,<sup>a</sup> Dan Sun,<sup>a\*</sup>

- a. Hunan Provincial Key Laboratory of Chemical Power Sources, College of Chemistry and Chemical Engineering, Central South University, Changsha, 410083, P. R. China.  
E-mail: sundan4330@csu.edu.cn
- b. College of Chemistry and Materials Engineering, Hunan University of Arts and Science, Changde 415000, Hunan, China.
- c. School of Chemistry and Chemical Engineering, Henan Normal University, Xinxiang 453007, P. R. China

## Experimental Section

### Material Preparation

The NVCTP-0, NVCTP-2, and NVCTP-4 composites were synthesized using a spray drying technique followed by a post-annealing process. All chemicals were used without further purification. The preparation method of the precursor solution is as follows: First, vanadium (IV)oxy acetylacetonate ( $C_{10}H_{14}O_5V$ ), tetrabutyl titanate ( $C_{16}H_{36}O_4Ti$ ) and chromic nitrate ( $Cr(NO_3)_3 \cdot 9H_2O$ ) are dissolved in 70 ml ethanol solution according to the stoichiometric ratio and vigorous stirring at  $80^\circ C$ . The solution was supplemented with 6.3 g of citric acid ( $C_6H_8O_7$ ) as a chelating agent and carbon source. Sodium acetate ( $C_2H_3NaO_2$ ) and phosphoric acid ( $H_3PO_4$ ) were sequentially added into the mixed solution formed above. The precursor solution was then treated with spray drying, and the inlet temperatures were set to  $170^\circ C$ . Finally, the dried precursor was followed by annealing at  $800^\circ C$  for 5 h in a tube furnace with Ar/ $H_2$  (95:5 vol: vol) atmosphere. NVCTP-0 is prepared by a similar approach except without adding  $Cr(NO_3)_3 \cdot 9H_2O$ .

### Material Characterizations

The chemical composition and crystal structure of the resulting materials were analyzed using X-ray diffraction (XRD, Rigaku/Ultima IV) and refined by Rietveld with the GSAS software. The property analyses of the carbon layer were undertaken on a laser micro-Raman spectrometer (Raman, Renishaw/inVia Reflex) with a laser wavelength of 532 nm, and the carbon contents were further tested by a thermogravimetric analyzer (TGA, Henven/HCT-1) from  $30^\circ C$  to  $800^\circ C$  with a ramping rate of  $10^\circ C \text{ min}^{-1}$  in air. The specific calculation criterion of carbon content is based on the mass loss of between 300 and  $550^\circ C$ , corresponding to the decomposition temperature of carbon in the air.<sup>1</sup> X-ray photoelectron spectroscopy (XPS, Thermo Fisher Scientific/ESCALAB250Xi) was performed to confirm the valence state of transition metals. The morphologies and microstructure images of the synthesized cathodes were observed by scanning electron microscope (SEM, JEOL/JSM-7610FPlus) and transmission electron microscope (TEM, JEM-2100F).

### Electrochemical Measurements

The electrochemical performance experiments were carried out by assembling 2016-type coin cells in an Argon-filled glove box. Using NVCTP-x as working electrodes, sodium metal as counter electrodes, and glass fiber filters as separators. The electrolyte was 1M  $NaClO_4$  dissolved in the mixed

solvent of propylene carbonate (PC) and 5% fluoroethylene carbonate (FEC) additive. To prepare a typical half-cell, the active material, Super P, and polyvinylidene fluoride (PVDF) were mixed in N-methyl-2-pyrrolidone (NMP) solvent at a mass ratio of 70:20:10. The obtained slurry was uniformly coated onto an Al foil and dried at 80°C under vacuum over 6 h. Afterward, the cathode was cut into circular electrodes (12 mm in diameter), and the loading mass of the active material was about 1.5-2.0 mg cm<sup>-2</sup>. To demonstrate the practical feasibility, CR2025 coin cells were further assembled using commercial hard carbon (HC, Kureha Carbotron P) as the anode and NVCTP-2 as the cathode. HC electrode was prepared by mixing with HC (92 wt%), super P (3 wt%), and CMC-SBR (5 wt%) in water followed by coating on Cu foil. To complete the presodiation process, the HC anode wet with the electrolyte was kept in contact with the metallic sodium for approximately 2 h. Notably, the loading of the NVCTP-2 electrode is approximately 1.5 times that of the HC electrode to match the capacity of full cells.

All assembled cells were aged over 6 h before electrochemical measurements. Galvanostatic charge-discharge (GCD) tests between 1.5-4.3 V (vs Na<sup>+</sup>/Na) were carried out on a Neware CT-3008W battery testing system. The parameters of the galvanostatic intermittent titration technique (GITT) were set with a current pulse duration of 0.5 h at 20 mA g<sup>-1</sup> and a further interval time of 2 h. Cyclic voltammetry (CV) curves were recorded on the CHI660e electrochemical workstation.

### **Calculation methods**

The DFT method, as implemented in the Vienna ab initio Simulation Package (VASP), was utilized for all calculations. The ion-electron interaction was handled via the projector augmented wave (PAW) scheme. To further enhance the description of d orbitals in transition metals, we employed the GGA+U method (U values for V, Ti and Cr are 4.2, 4.0 and 3.7 eV, respectively). The plane-wave energy cutoff and the force convergence criterion were set to 500 eV and 0.02 eV Å<sup>-1</sup> respectively.

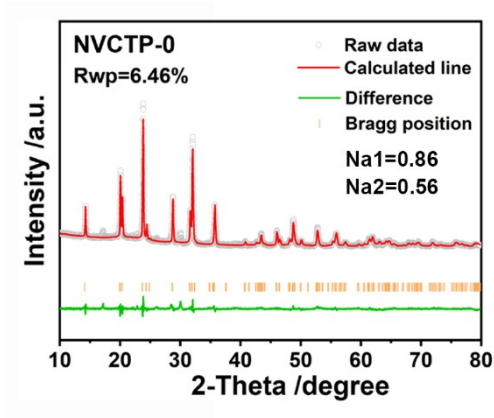

Fig. S1. XRD Rietveld refinement of NVCTP-0 sample.

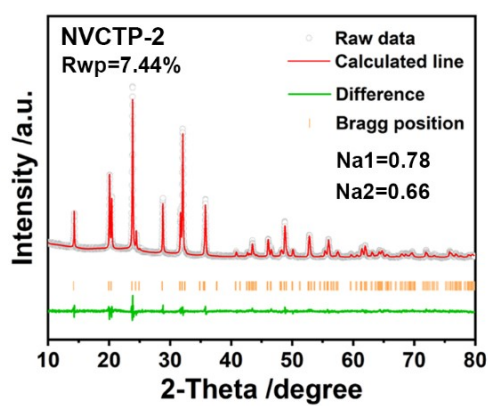

Fig. S2. XRD Rietveld refinement of NVCTP-2 sample.

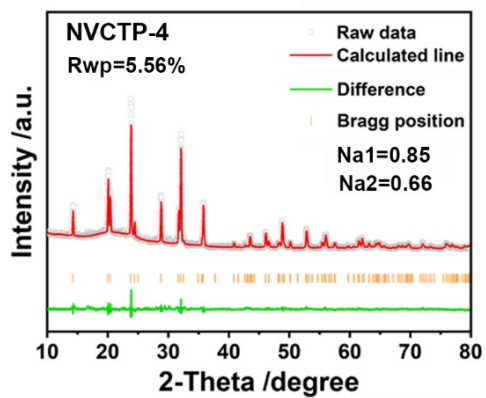

Fig. S3. XRD Rietveld refinement of NVCTP-4 sample.

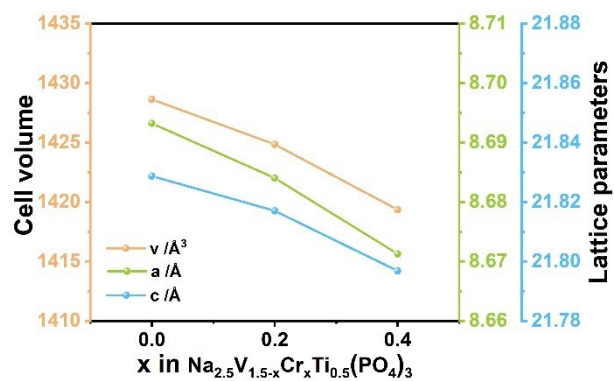

Fig. S4. Cell volume and Lattice parameter variation of NVCTP-x samples.

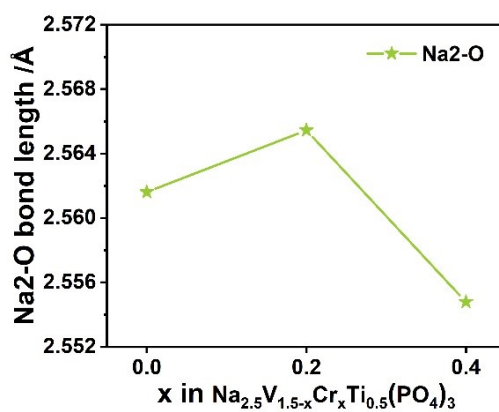

Fig. S5. Bond length of Na2-O in NVCTP-x samples.

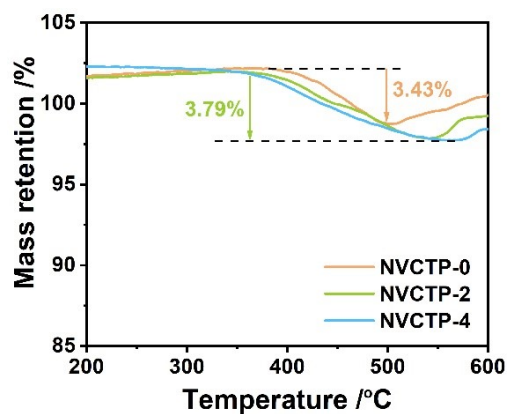

Fig. S6. TG curves of NVCTP-0, NVCTP-2, and NVCTP-4 samples.

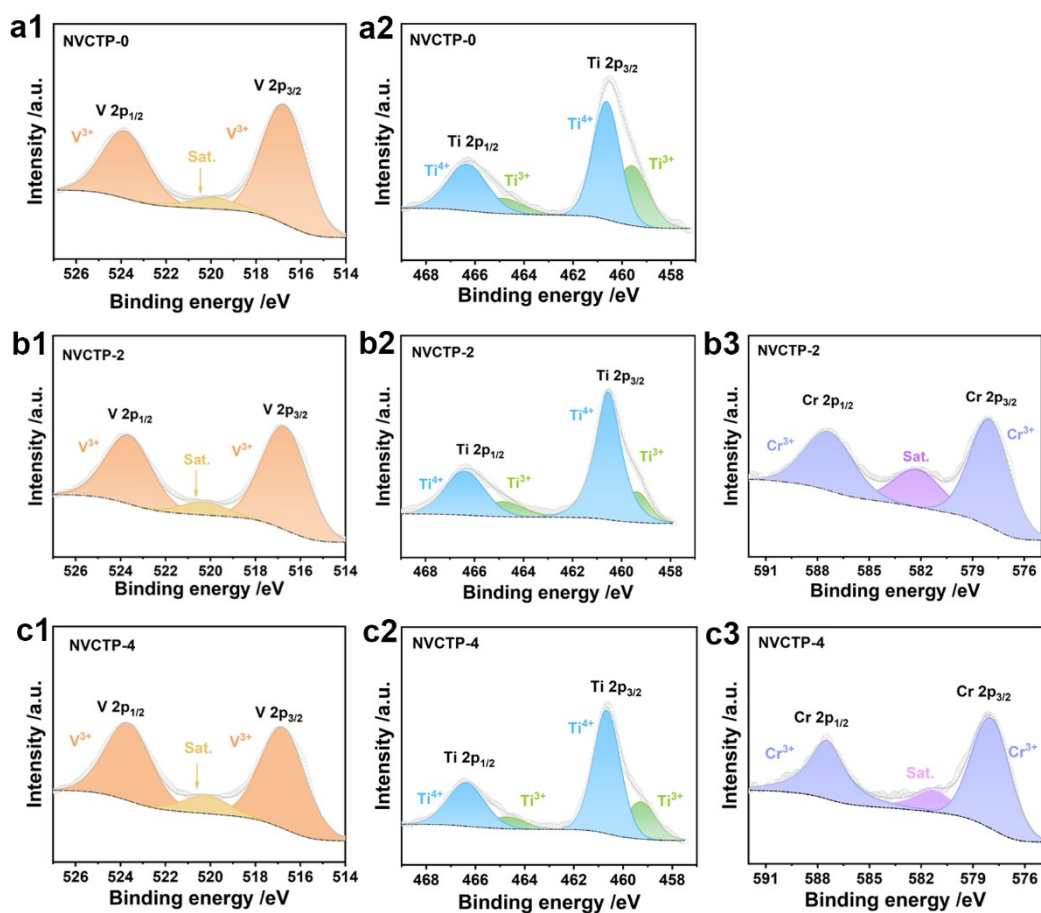

**Fig. S7.** High-resolution spectra of V 2p, Ti 2p and Cr 2p for (a) NVCTP-0, (b) NVCTP-2 and (c) NVCTP-4 samples.

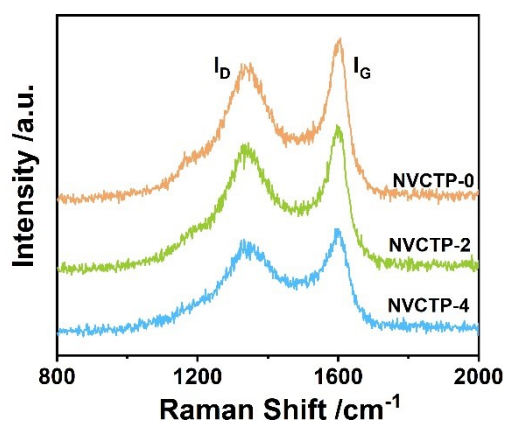

**Fig. S8.** Raman spectra of NVCTP-0, NVCTP-2, and NVCTP-4 samples.

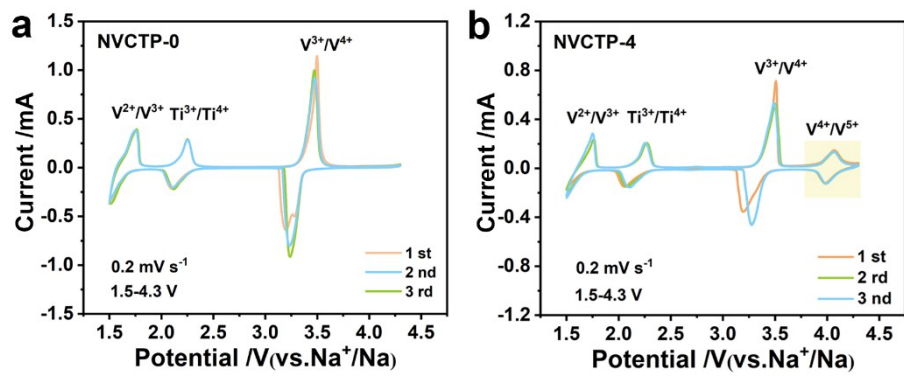

**Fig. S9.** CV curves of (a) NVCTP-0 and (b) NVCTP-4 electrodes.

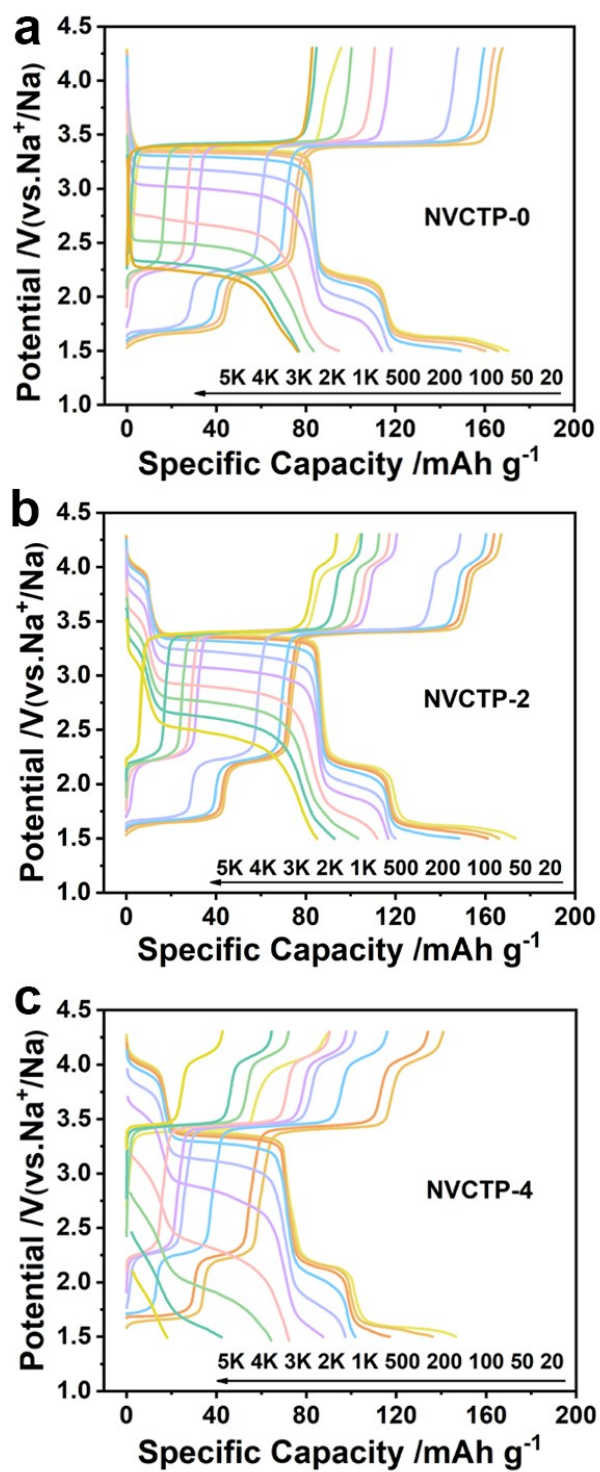

**Fig. S10.** The GCD curves of (a) NVCTP-0, (b) NVCTP-2 and (c) NVCTP-4 cathodes from 20 to

5000 mA g<sup>-1</sup>.



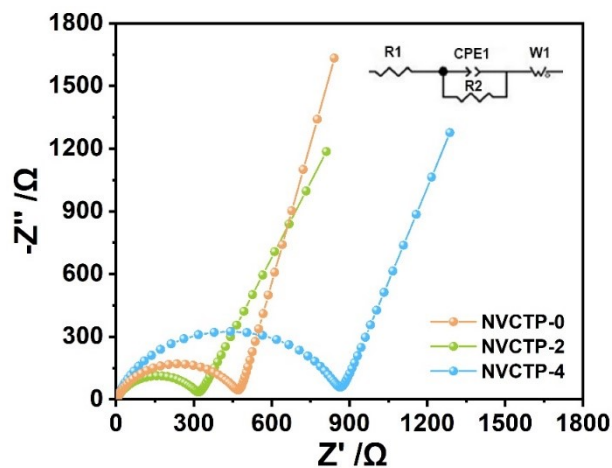

**Fig. S11.** EIS spectra of NVCTP-0, NVCTP-2 and NVCTP-4.

The Nyquist plots consist of a semicircle in the high-frequency region, which corresponds to the charge transfer resistance ( $R_{ct}$ ), and a sloping line relating to the Warburg impedance ( $Z_w$ ) in the low-frequency region.<sup>2,3</sup> The inset shows a characteristic EIS equivalent circuit fitting that includes an electrolyte resistor ( $R_1$ ), a charge transfer resistor ( $R_2$ ), and a constant phase angle element (CPE).<sup>4</sup>

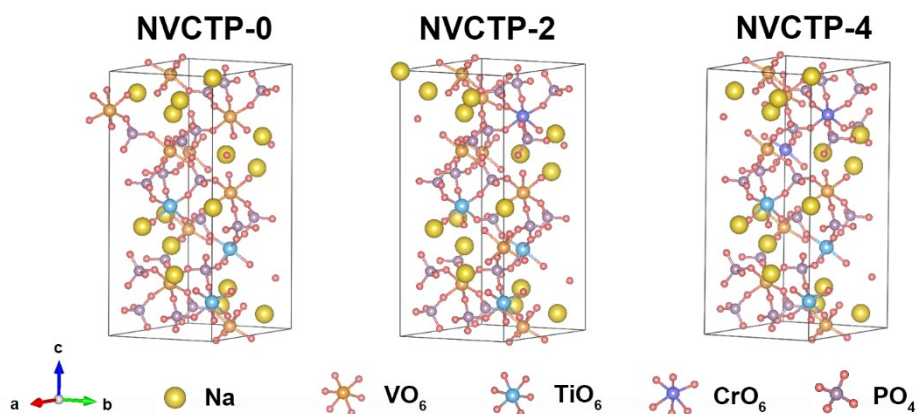

**Fig. S12.** Optimized crystal structure of NVCTP-0, NVCTP-2 and NVCTP-4.

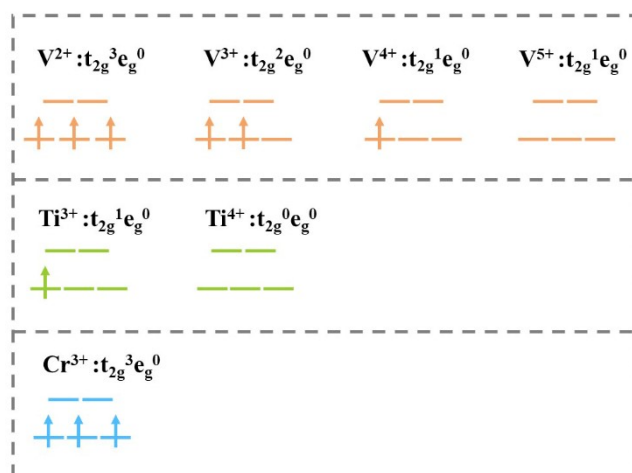

Fig. S13. Schematic view of the electronic configurations of transition-metal ions.

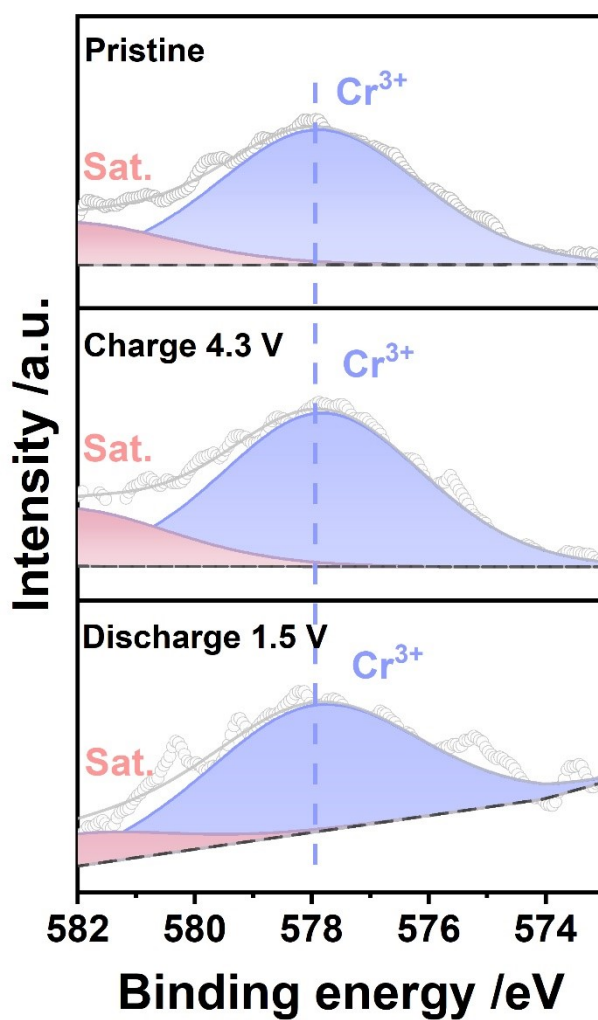

Fig. S14. Ex-situ XPS spectra of Cr  $2p_{3/2}$  for NVCTP-2.

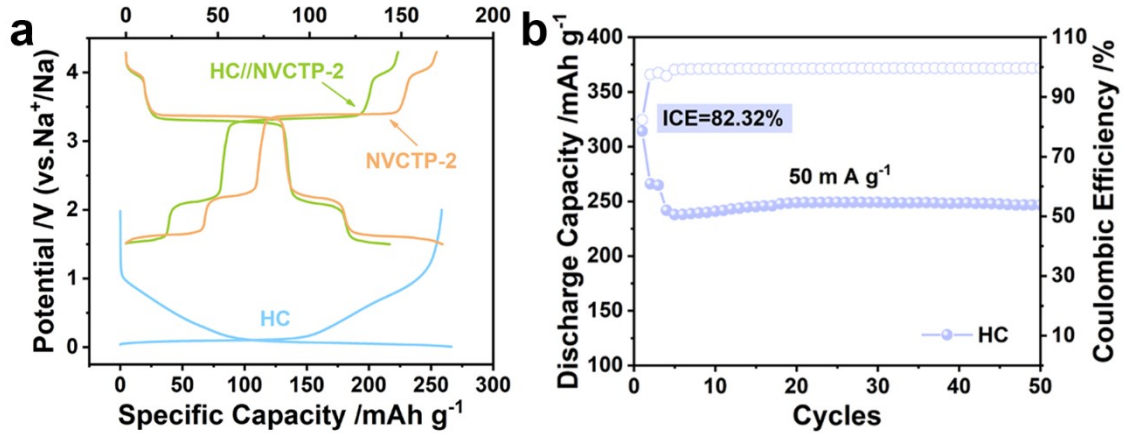

**Fig. S15.** (a) GCD profiles of NVCTP-2 cathode, HC anode, HC//NVCTP-2 full cell. (b) Long-term cyclability of HC in the voltage range of 0.01-2 V.

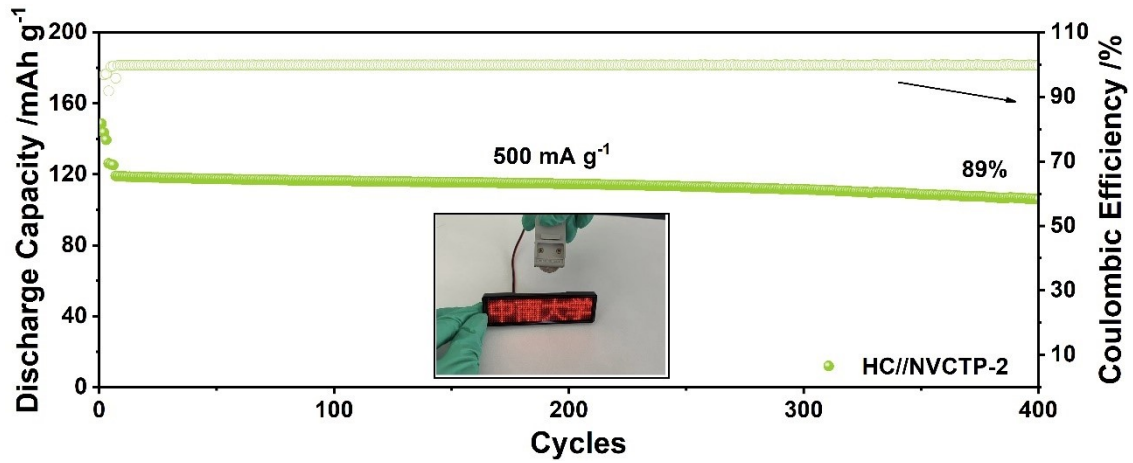

**Fig. S16.** Long-term cycling stability of HC//NVCTP-2 at 500 mA g<sup>-1</sup>.

### Calculation process for the $D_{Na^+}$ values through GITT tests:

The diffusion coefficient ( $D_{Na^+}$ ) of the as-prepared cathodes is calculated from the GITT potential profiles using Fick's second law. The calculation formula is as follows:

$$D_{Na} = \frac{4}{\pi\tau} \left( \frac{m_B V_m}{M_B S} \right)^2 \left( \frac{\Delta E_s}{\Delta E_\tau} \right)^2 \quad \left( \tau \ll \frac{l^2}{D_{Na^+}} \right)$$

where  $\tau$  represents the duration of the current pulse;  $m_B$  is the mass loading of the electrode material;  $S$  is the geometric area of the electrode;  $\Delta E_S$  is the quasi-thermodynamic equilibrium potential difference between before and after the current pulse;  $\Delta E_\tau$  is the potential difference during the current pulse;  $V_m$  is the molar volume of the electrode material; and  $M_B$  is the molar mass of the electrode material.

**Table S1.** Rietveld structure information of the NVCTP-0 sample.

| Space group=R-3c   | Rwp=6.46%      |          |                              |        |
|--------------------|----------------|----------|------------------------------|--------|
| a(Å)=b(Å)= 8.69323 | c(Å)= 21.82872 |          | V(Å <sup>3</sup> )= 1428.634 |        |
| α(°)=90            | β(°)=90        |          | γ(°)=120                     |        |
| Atom               | x              | y        | z                            | frac   |
| Na1                | 0.333300       | 0.666700 | 0.166700                     | 0.8579 |
| Na2                | 0.666700       | 0.969951 | 0.083300                     | 0.5555 |
| V                  | 0.333300       | 0.666700 | 0.019775                     | 0.7500 |
| Ti                 | 0.333300       | 0.666700 | 0.020030                     | 0.2500 |
| P                  | -0.043082      | 0.333300 | 0.083300                     | 1.0000 |
| O1                 | 0.143080       | 0.499067 | 0.080704                     | 1.0000 |
| O2                 | 0.540597       | 0.842954 | -0.025611                    | 1.0000 |

---

**Table S2.** Rietveld structure information of the NVCTP-2 sample.

| Space group=R-3c   | Rwp=7.44%      |         |                              |        |
|--------------------|----------------|---------|------------------------------|--------|
| a(Å)=b(Å)= 8.68402 | c(Å)= 21.81703 |         | V(Å <sup>3</sup> )= 1424.846 |        |
| α(°)=90            | β(°)=90        |         | γ(°)=120                     |        |
| Atom               | x              | y       | z                            | frac   |
| Na1                | 0.33330        | 0.66670 | 0.16670                      | 0.7816 |
| Na2                | 0.66670        | 0.96103 | 0.08330                      | 0.6561 |
| V                  | 0.33330        | 0.66670 | 0.02122                      | 0.6500 |
| Ti                 | 0.33330        | 0.66670 | 0.02004                      | 0.2500 |
| Cr                 | 0.33330        | 0.66670 | 0.02122                      | 0.1000 |
| P                  | -0.04215       | 0.33330 | 0.08330                      | 1.0000 |
| O1                 | 0.14572        | 0.49818 | 0.07945                      | 1.0000 |
| O2                 | 0.53776        | 0.84147 | -0.02638                     | 1.0000 |

---

**Table S3.** Rietveld structure information of the NVCTP-4 sample.

| Space group=R-3c   |          | Rwp=5.56%      |                              |        |
|--------------------|----------|----------------|------------------------------|--------|
| a(Å)=b(Å)= 8.67127 |          | c(Å)= 21.79682 | V(Å <sup>3</sup> )= 1419.350 |        |
| α (°)=90           |          | β(°)=90        | γ(°)=120                     |        |
| Atom               | x        | y              | z                            | frac   |
| Na1                | 0.33330  | 0.66670        | 0.16670                      | 0.8531 |
| Na2                | 0.66670  | 0.96422        | 0.08330                      | 0.6555 |
| V                  | 0.33330  | 0.66670        | 0.02100                      | 0.5500 |
| Ti                 | 0.33330  | 0.66670        | 0.01941                      | 0.2500 |
| Cr                 | 0.33333  | 0.66670        | 0.02040                      | 0.2000 |
| P                  | -0.04588 | 0.33330        | 0.08330                      | 1.0000 |
| O1                 | 0.14436  | 0.49592        | 0.07925                      | 0.9962 |
| O2                 | 0.54087  | 0.84116        | -0.02663                     | 1.0000 |

**Table S4.** Rietveld structure information of the NVCTP-2 cathode at pristine, 4.3 V and 1.5 V.

| State    | Rwp (%) | a,b (Å) | c (Å)   | V (Å <sup>3</sup> ) |
|----------|---------|---------|---------|---------------------|
| Pristine | 3.45    | 8.6796  | 21.8113 | 1423.009            |
| 4.3 V    | 8.02    | 8.5849  | 21.7851 | 1390.483            |
| 1.5 V    | 2.42    | 8.6896  | 21.8252 | 1425.899            |

**Reference:**

- 1 H. Li, T. Jin, X. Chen, Y. Lai, Z. Zhang, W. Bao and L. Jiao, *Adv. Energy Mater.*, 2018, **8**, 1801418.
- 2 J. Lee, S. Park, Y. Park, J. Song, B. Sambandam, V. Mathew, J.-Y. Hwang and J. Kim, *Chem. Eng. J.*, 2021, **422**, 130052.
- 3 B. Xing, J. Ren, P. Hu, W. Luo, B. Mai, H. Cai, J. Wu, X. Wu, X. Chen, Z. Deng, W. Feng and L. Mai, *Small*, 2024, **20**, 2310997.
- 4 K. Wang, X. Huang, T. Zhou, D. Sun, H. Wang and Z. Zhang, *J. Mater. Chem. A*, 2022, **10**, 10625–10637.
